# Supplementary material for: Evolutionarily conserved partial gene duplication in the Triticeae tribe of grasses confers pathogen resistance
Source: PubMed Central journal article supplement (PMC6092874; doi:10.1186/s13059-018-1472-7), 2018-08-15
Supplement: 13059_2018_1472_MOESM1_ESM.pdf [file 13059_2018_1472_MOESM1_ESM.pdf]

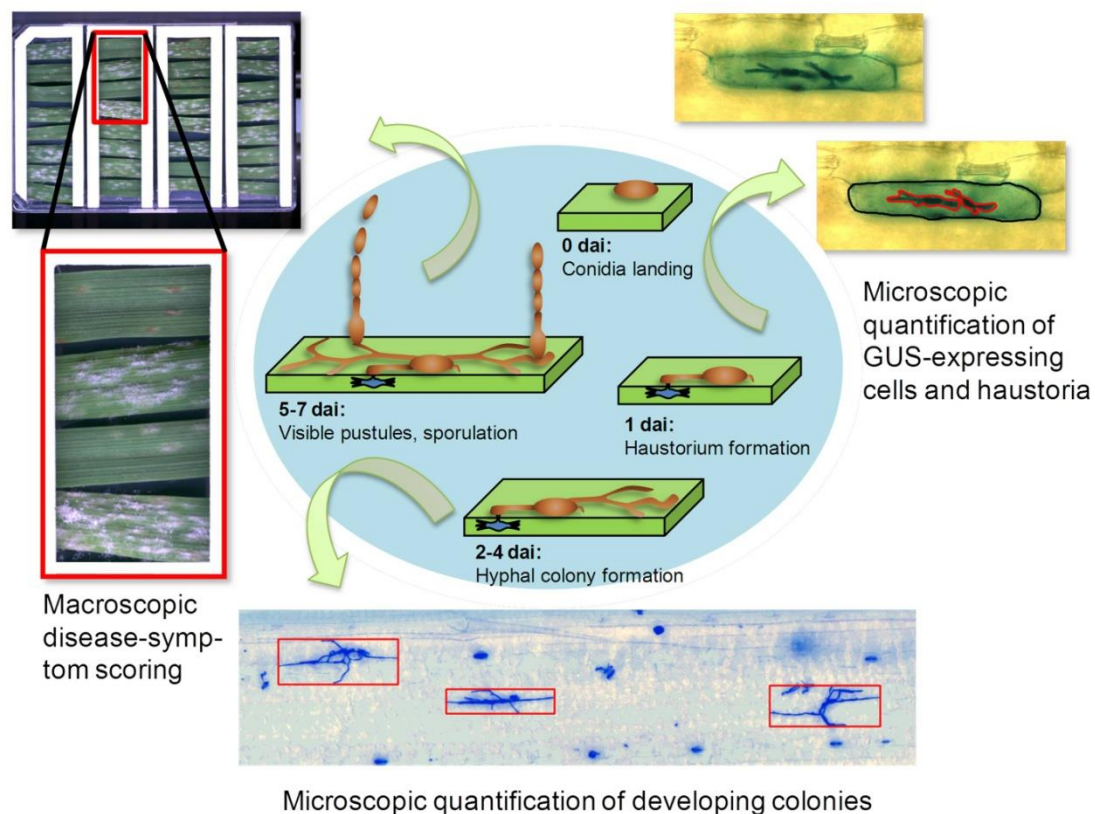

**Figure S1:** Asexual life cycle of *Blumeria graminis* and the assessment of fungal development in barley (*Hordeum vulgare*) and wheat (*Triticum aestivum*).

For transient-induced gene silencing (TIGS) and for transient over-expression (OEX), initial haustorium (feeding cell) formation in transformed, GUS-expressing epidermal cells of barley or wheat is completed 1 day after inoculation (dai) and was assessed under the microscope 40 h after inoculation. For the characterization of transgenic plants, early developing colonies were stained by Coomassie blue, counted and normalized to the analysed leaf area at 2 dai. The asexual life cycle is completed by the appearance of macroscopically visible, sporulating colonies (pustules) 5-7 dai, which can be estimated or quantified as percentage of pustule-covered leaf area. However, for the results described here, macroscopic disease quantification was not used.

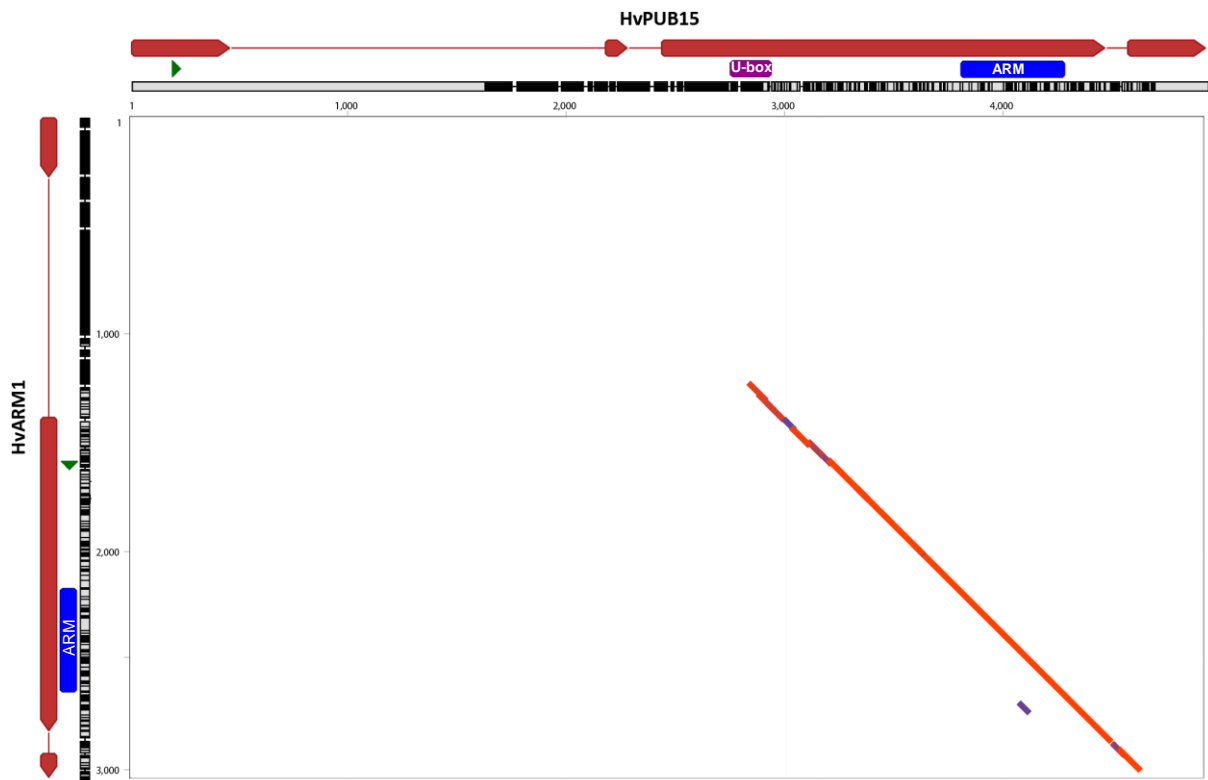

**Figure S2:** Alignment of *HvPUB15* and *HvARM1* genomic sequences.

Dot plot alignment showing the similarity between the genomic sequences of *HvPUB15* (on the top) and *HvARM1* (on the Y-axis). The dot matrix chart was generated using Geneious 10.0.9 [1] with high sensitivity/fast setting using a window size of 30, threshold of 80 and tile size of 1000. Dot plot lines are generated by the software according to the length of the match: blue for short matches and red for matches over 100bp. U-box domain and ARM repeat domain (ARM) are indicated on *HvPUB15* and *HvARM1*, respectively. Green arrowheads indicate start codon position.

**a**

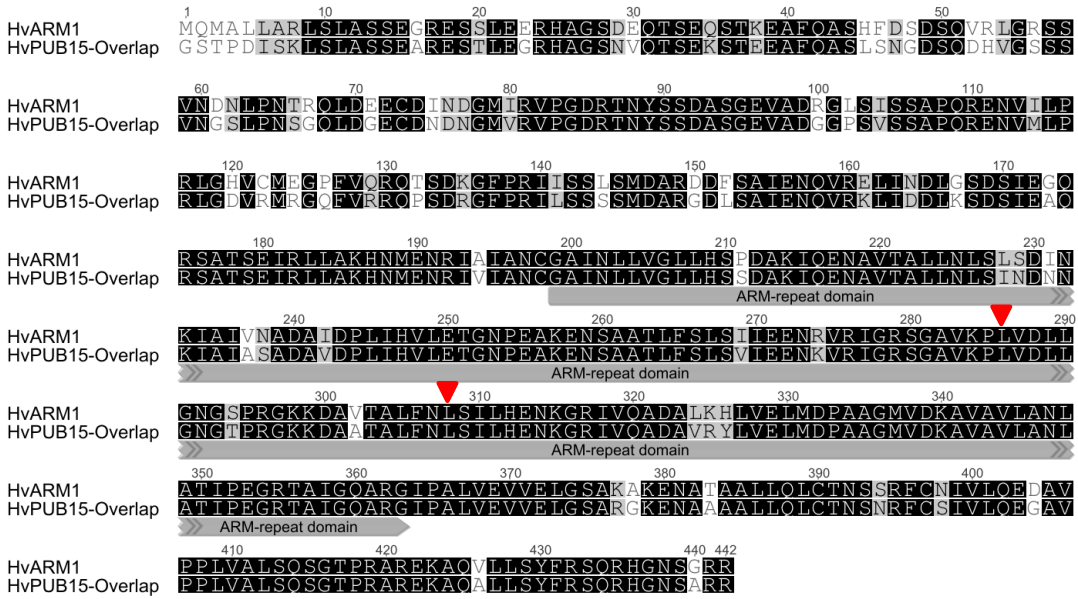

**b**

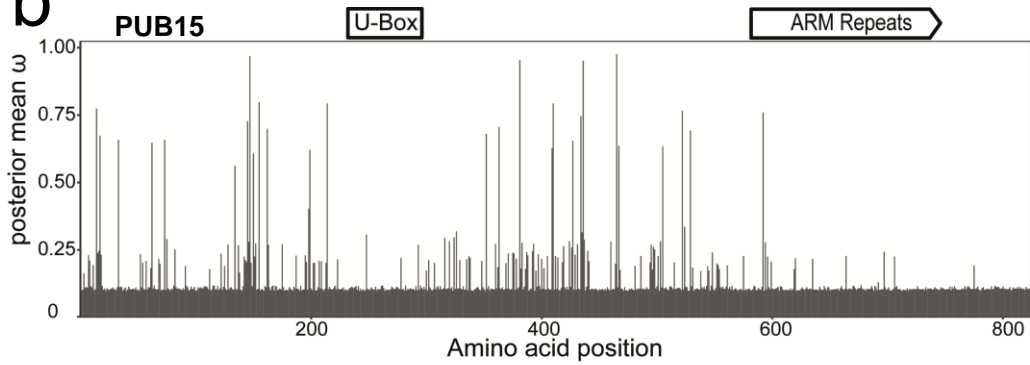

**c**

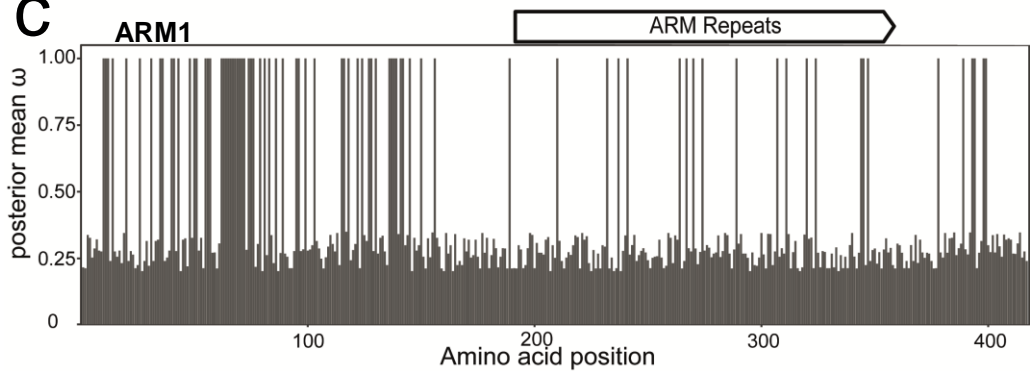

**d**

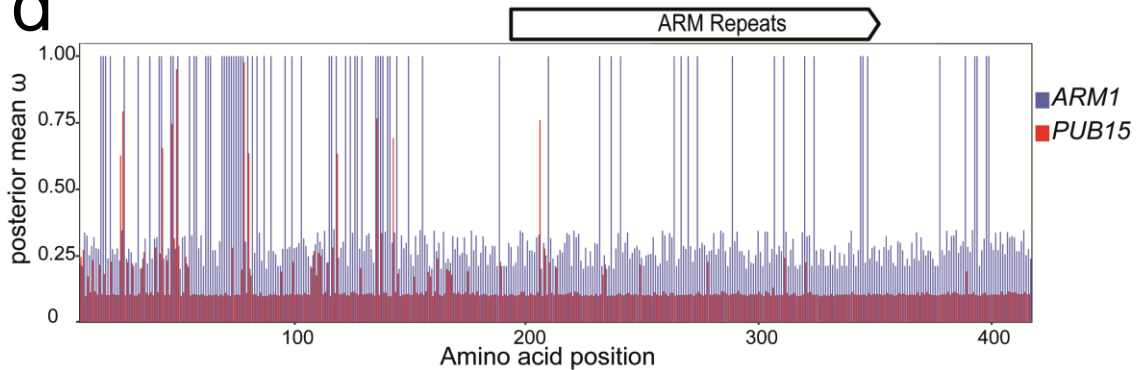

**Figure S3:** Protein sequences alignment and  $d_N/d_S$  analysis of ARM1 and PUB15

**(a)** Alignment of amino-acid sequences of HvARM1 (starting at AA1) and HvPUB15 (starting at AA390). ARM repeat domain is shown in grey shade under the alignment; Red inverted triangle, sites of point mutation (Additional file 1: Figure S14). Pattern of selection pressure detected along PUB15 **(b)** and ARM1 **(c)** genes, respectively and among the overlapping region of PUB15 and ARM1 genes in the selected six Triticeae species plus rice **(d)** as determined by the ratio of non-synonymous to synonymous nucleotide exchanges ( $\omega$ ) per codon. An  $\omega < 1$  suggests constraint, or purifying selection while an  $\omega > 1$  indicates positive selection and  $\omega = 1$  for neutral changes. Position of U-box and ARM repeat domain is indicated.

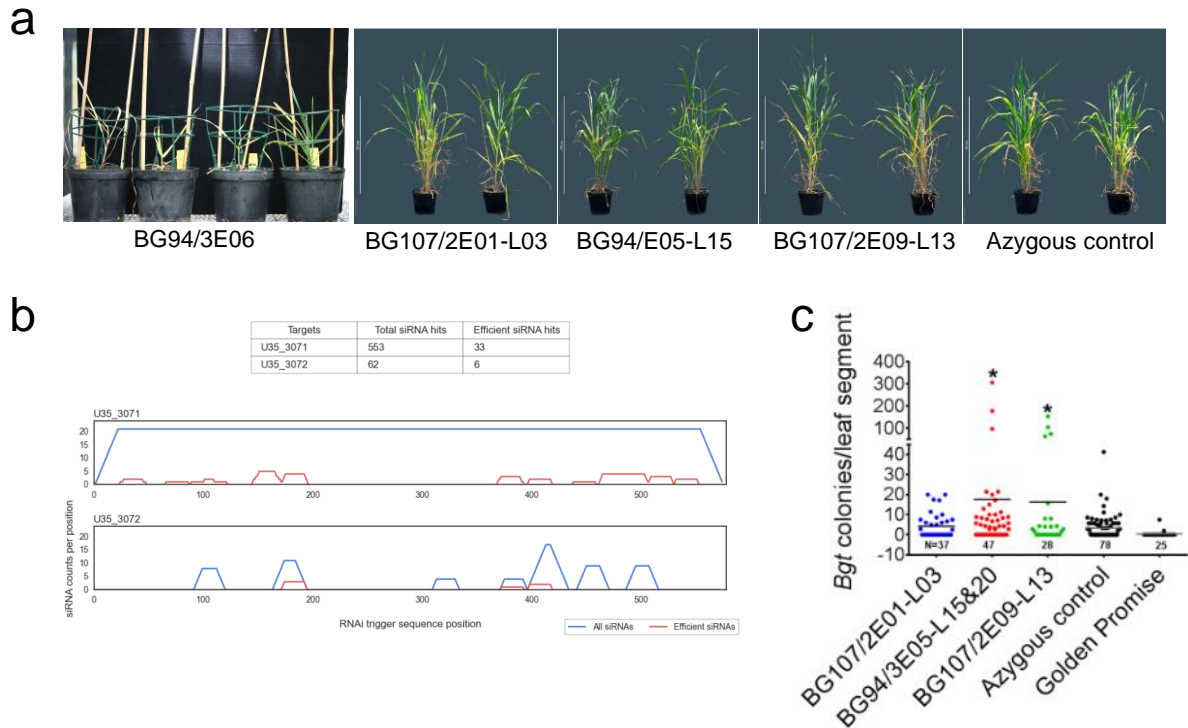

**Figure S4:** (a) Growth phenotypes of *HvARM1*-RNAi transgenic seedlings from event BG94/3E06 exhibiting more severe seedling lethality in T1 (not used for phenotyping in T3 generation) and of adult plants from event BG107/2E01, BG94/E05, and BG107/2E09 in T3 that was used for *Bgh* and *Bgt* resistance tests. (b) Prediction by the si-Fi21 software of siRNA hits in target-transcript *HvARM1* (U35\_3071) and potential off-target *HvPUB15* (U35\_3072) by using the hairpin dsRNA region of the construct for stable RNAi plants as input sequence. The search was conducted in the “off-target prediction” mode of si-Fi21, including default setting of end stability difference and target-site accessibility. (c) Detached second leaves of T3 transgenic barley RNAi plants were inoculated with *Bgt* and infection was assessed microscopically 72 hours after inoculation. Data represent normalized colony density (number/cm<sup>2</sup>/leaf area) from 2-3 biological replications and horizontal line indicate the mean. Statistical differences between transgenic events and azygous plants are indicated by asterisks. \*,  $p < 0.05$  (student’s t-test; two-tailed).

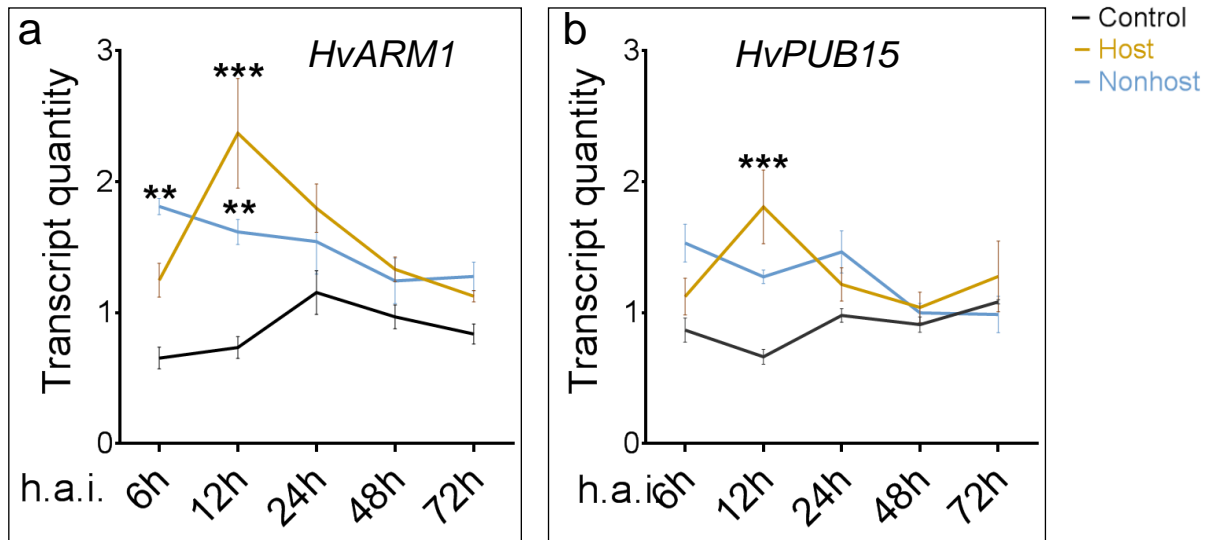

**Figure S5:** Expression of *HvARM1* in barley leaf epidermis following *B. graminis* attack. Transcript quantities of *HvARM1* and *HvPUB15* were determined by RT-qPCR in RNA samples of epidermal peels using TaqMan probes. Mean  $\pm$  SD of transcript quantity (relative to *HvUBC*, Acc. AK252586.1) from two biological replicates with three technical replicates each are shown. Differences between control and inoculated samples are indicated by asterisks. \*\*,  $p < 0.005$ ; \*\*\*,  $p < 0.0005$  (ANOVA with Bonferroni's multiple comparisons test).

Barley

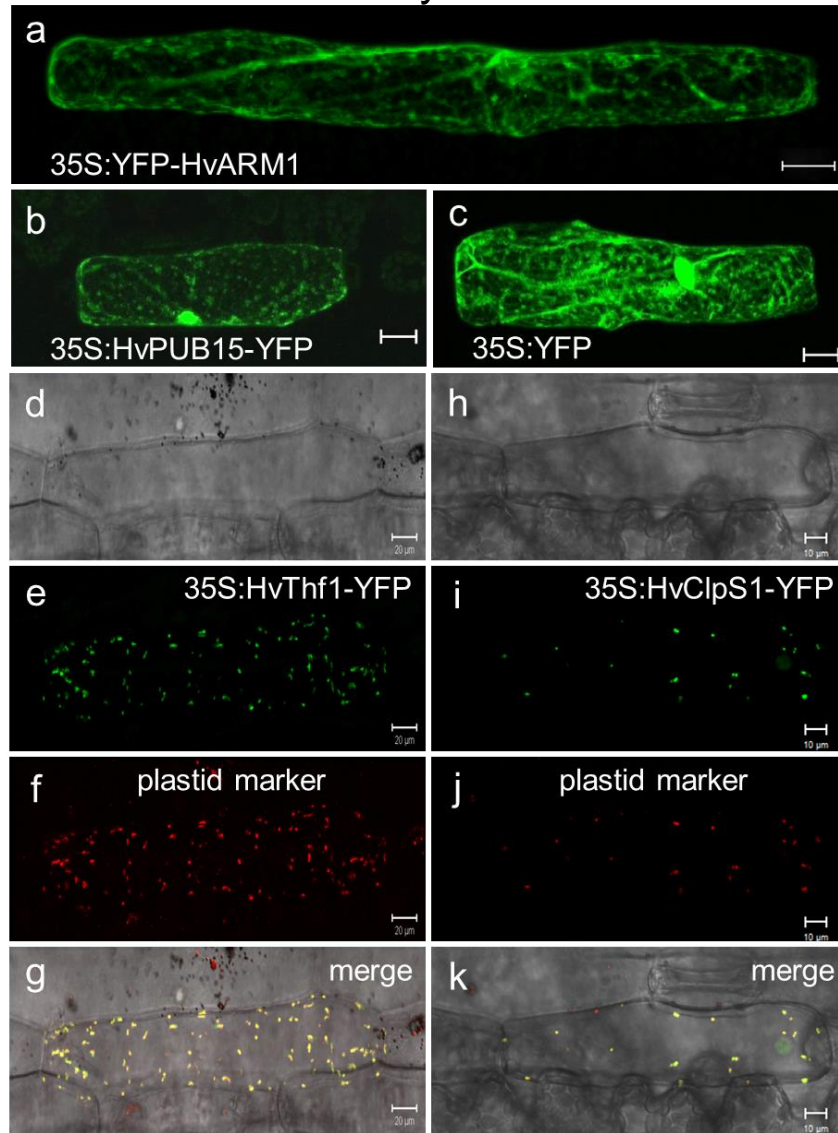

*N. benthamiana*

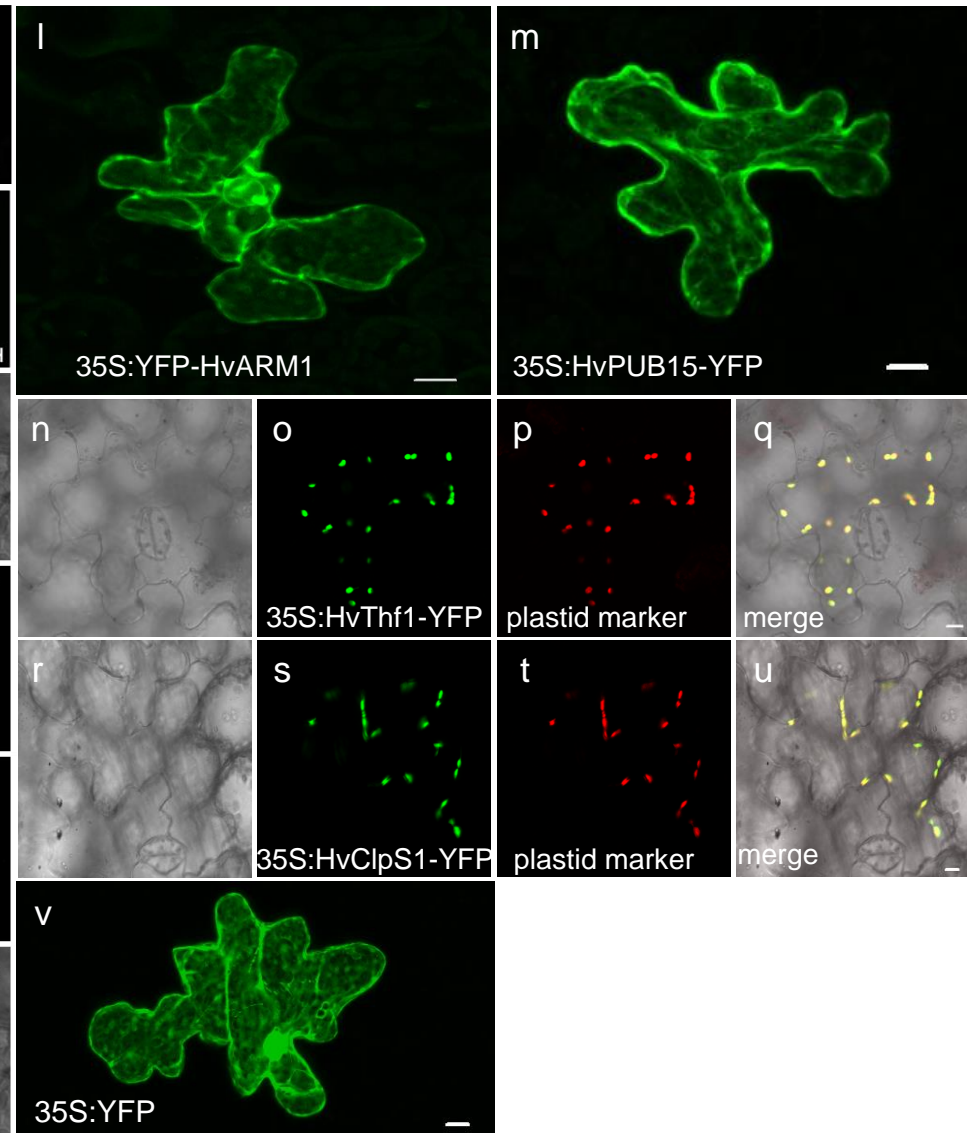

**Figure S6:** HvARM1 and HvPUB15 are localized in the cytoplasm whereas two putative interacting proteins are targeted to plastids.

Fluorescently labelled fusion proteins were transiently expressed in barley and *N. benthamiana* epidermal cells by particle bombardment. Micrographs were taken 12-18 h after bombardment by using a confocal laser-scanning microscope. The images shown are representative samples from four biological replications in barley and two in *N. benthamiana*. Panels (a and b, l and m), localization of HvARM1 fused N-terminally to YFP, HvPUB15 fused C-terminally to YFP in barley and *N. benthamiana*, respectively. Panel (c) localisation of wildtype YFP in barley. Panels (d and h, and n and r), bright field images, panels (e and i, and o and s), punctate localization of HvThf1 and HvClpS1 fused C-terminally to YFP in barley and *N. benthamiana*, respectively. Panels (f and j, and p and t), localization of the plastid marker obtained by fusing mCherry N-terminally to the first 79 amino acids of Rubisco small subunit (SSU, construct pt-rkCD3-999; [2]). Panels (g and k, and q and u), merge of bright field, YFP- and mCherry signals from panels (d-f), (h-j), (n-p) and (r-t) in barley and *N. benthamiana*, respectively. Panel (c and v) localisation of wildtype YFP in barley and *N. benthamiana*, respectively.



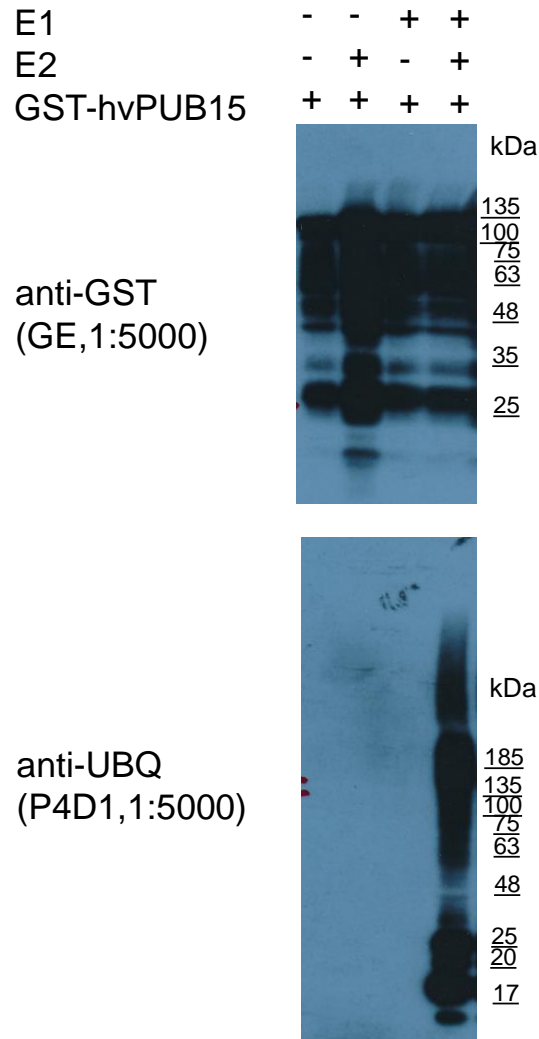

**Figure S7:** In vitro ubiquitin ligase activity of HvPUB15.

In vitro ubiquitination assay was performed as described [3] with the following modifications: Recombinant proteins were expressed by 1:50 transfer of an overnight culture of *E.coli* Rosetta 2 cells (expression vector pGEX4T1) into 100 ml LB medium (without antibiotics) and addition of 0.1 mM IPTG for 3 h at OD=0.5 (28°C). Proteins were purified (in 15 ml Sarstedt tubes) by sonication at 50% 3x 15 sec in 10 ml PBS (AEBSF, 5mM DTT), followed by 40 min 100,000 x g centrifugation. 25 µl of slurry was incubated for 1h at RT, followed by washing 3 times with PBS (+AEBSF, DTT) and centrifugation up to 500g. Aliquots of the reactions were separated by SDS-PAGE, followed by protein blotting and immunodetection of ubiquitinated proteins or ubiquitin oligomers.

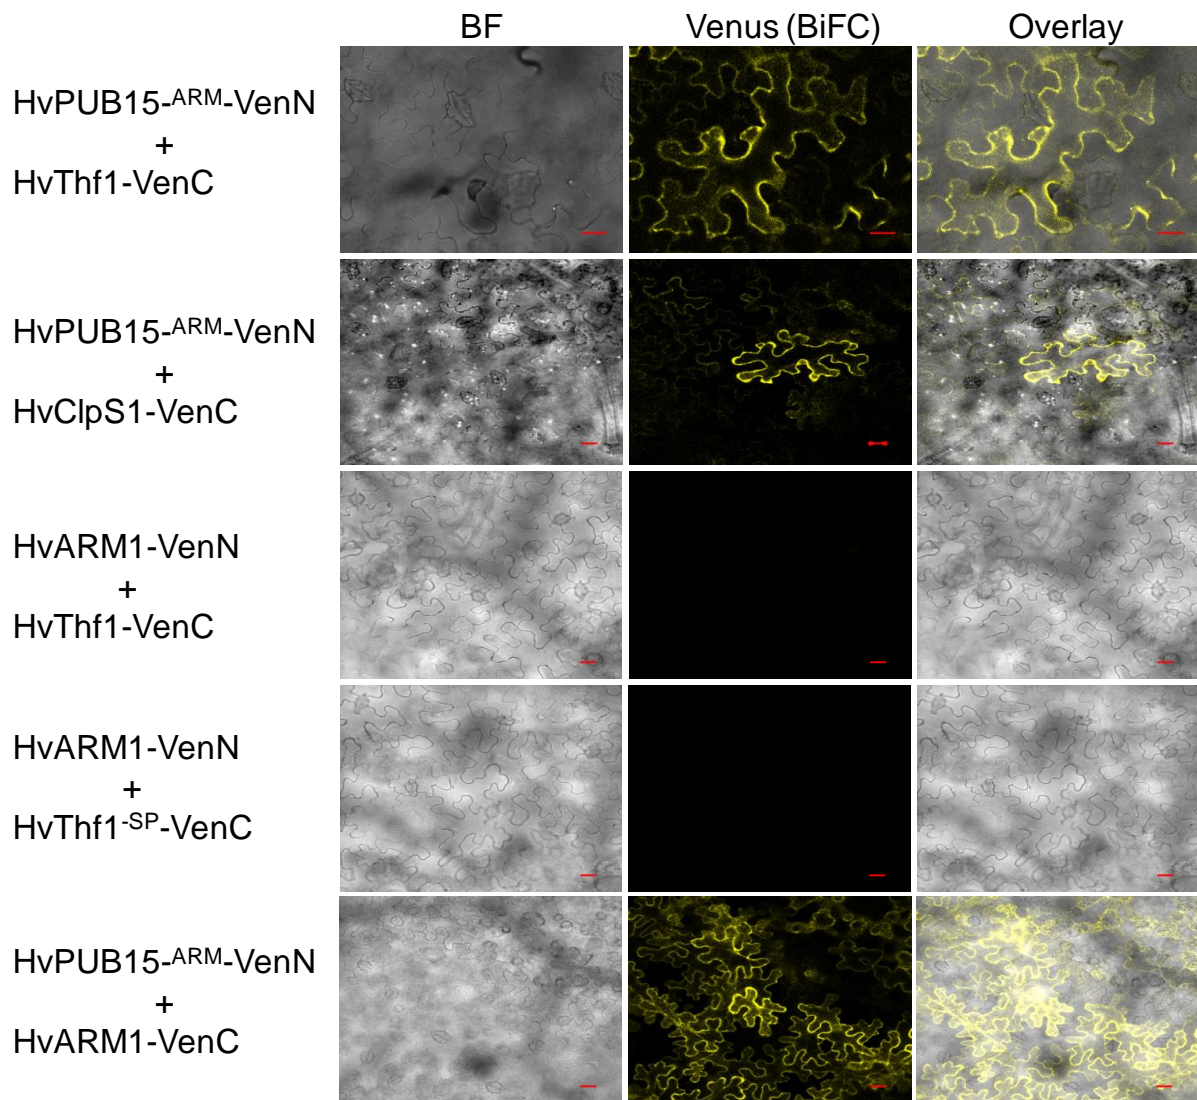

**Figure S8:** Additional controls for BiFC in *N. benthamiana* leaves.

The specificity of HvPUB15 interaction with HvThf1 and HvClpS1 was further verified using only the ARM-domain of HvPUB15. A BiFC signal indicates that ARM-domain of HvPUB15 is involved in interaction with HvThf1 and HvClpS1. Further, the specificity of HvARM1 interaction with HvThf1 was confirmed by switching the split-YFP parts and also by deletion of N-terminal plastid import signal (HvThf1<sup>-SP</sup>). Absence of BiFC signal in HvARM1-VenN+HvThf1-VenC and HvARM1-VenN +HvThf1<sup>-SP</sup>-VenC and presence of BiFC signal in HvThf1<sup>-SP</sup>-VenN+HvARM1-VenC (Figure 4) indicates specificity in interaction. BF, bright field; -SP, with deleted N-terminal plastid import signal; VenN, N-terminal half of the stabilized YFP version “Venus”; VenC, C-terminal half of the YFP “Venus”. Scale bars, 20 μm.

### HvPUB15 + HvThf1 BiFC

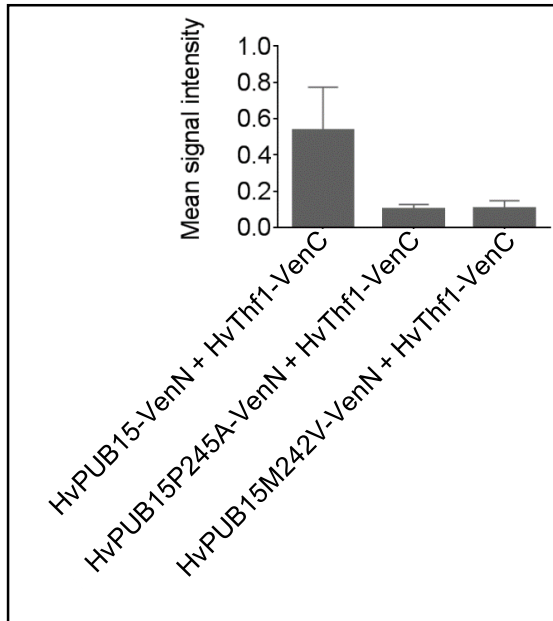

### HvPUB15 + HvClpS1 BiFC

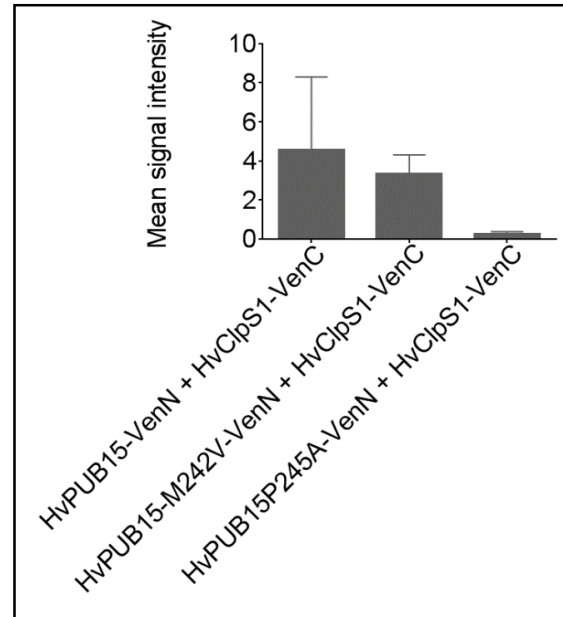

### HvARM1 + HvThf1 and HvARM1 + HvClpS1 BiFC

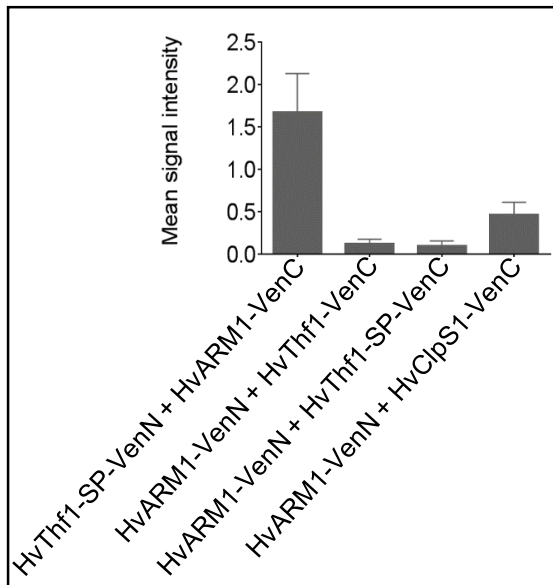

### HvPUB15 + HvARM1 BiFC

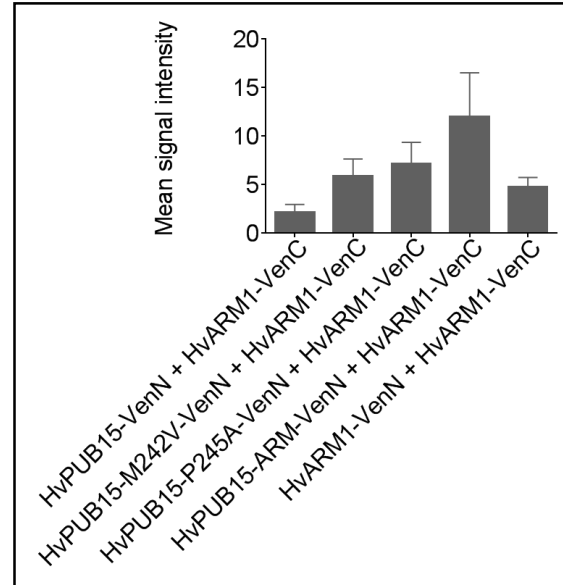

**Figure S9:** Quantification of BiFC signals in *N. benthamiana* leaves.

In order to quantify the specificity of BiFC intensity signal, approximately 10 images per interaction were acquired at random positions on infiltrated leaf areas with constant imaging settings [4]. Mean YFP-signal intensity was calculated using the ZEN software (ver.2.1). Data represents the mean  $\pm$  SD.

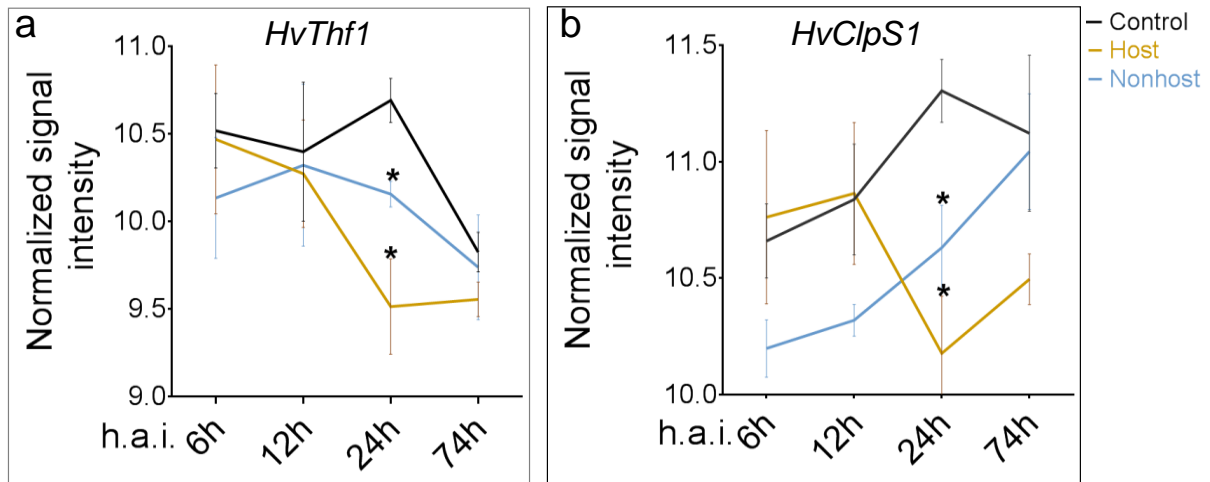

**Figure S10:** Time course of *HvThf1* (a) and *HvClpS1* (b) mRNA levels in barley epidermal peels challenged with host (*Bgh*) and nonhost (*Bgt*) powdery mildew pathogens. Profile plots show quantile-normalized signal intensity values ( $\log_2$  transformed) from the Agilent 44k oligonucleotide array [5]. Mean  $\pm$  SEM of 3 biological replicates; \* indicates significant differences from non-inoculated control at  $p < 0.05$  level (unpaired t-test unpaired, two-tailed). Normalized signal intensities of the two transcripts are shown in Additional file 2: Table S7.

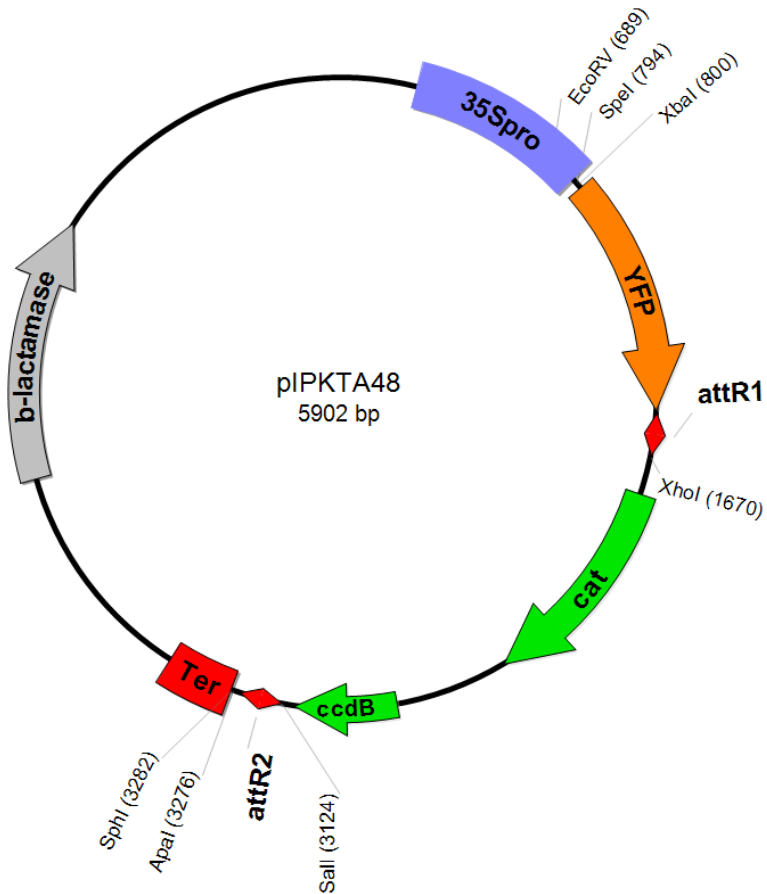

**Figure S11:** Plasmid map of pIPKTA48 for transient expression of YFP-tagged plant proteins.

The transient expression vector pIPKTA9 [6] was double-digested with *XhoI*, and *XbaI*. The gateway cassette including the YFP tag from the binary vector pGWB41 [7] was double-digested with *XbaI*-*EcoI*CRI (*EcoI*136II) and ligated into pIPKTA9 between the *XhoI*-*XbaI* sites. This resulted in the Gateway-compatible transient expression vector pIPKTA48 to allow N-terminal YFP fusions.

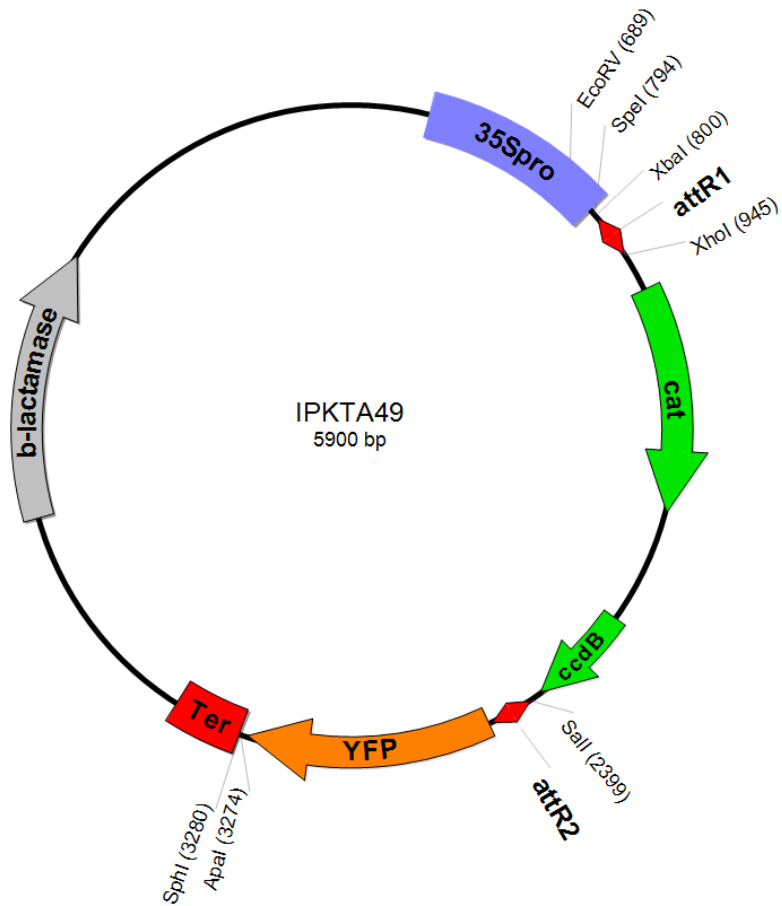

**Figure S12:** Plasmid map of pIPKTA49 for transient expression of YFP-tagged plant proteins.

The transient expression vector pIPKTA9 [6] was double-digested with *XhoI*, and *XbaI*. The gateway cassette including the YFP tag from the binary vector pGWB42 [7] was double-digested with *XbaI-EcoICRI* (*EcoI*136II) and ligated into pIPKTA9 between the *XhoI-XbaI* sites. This resulted in the Gateway-compatible transient expression vector pIPKTA49 to allow C-terminal YFP fusions.

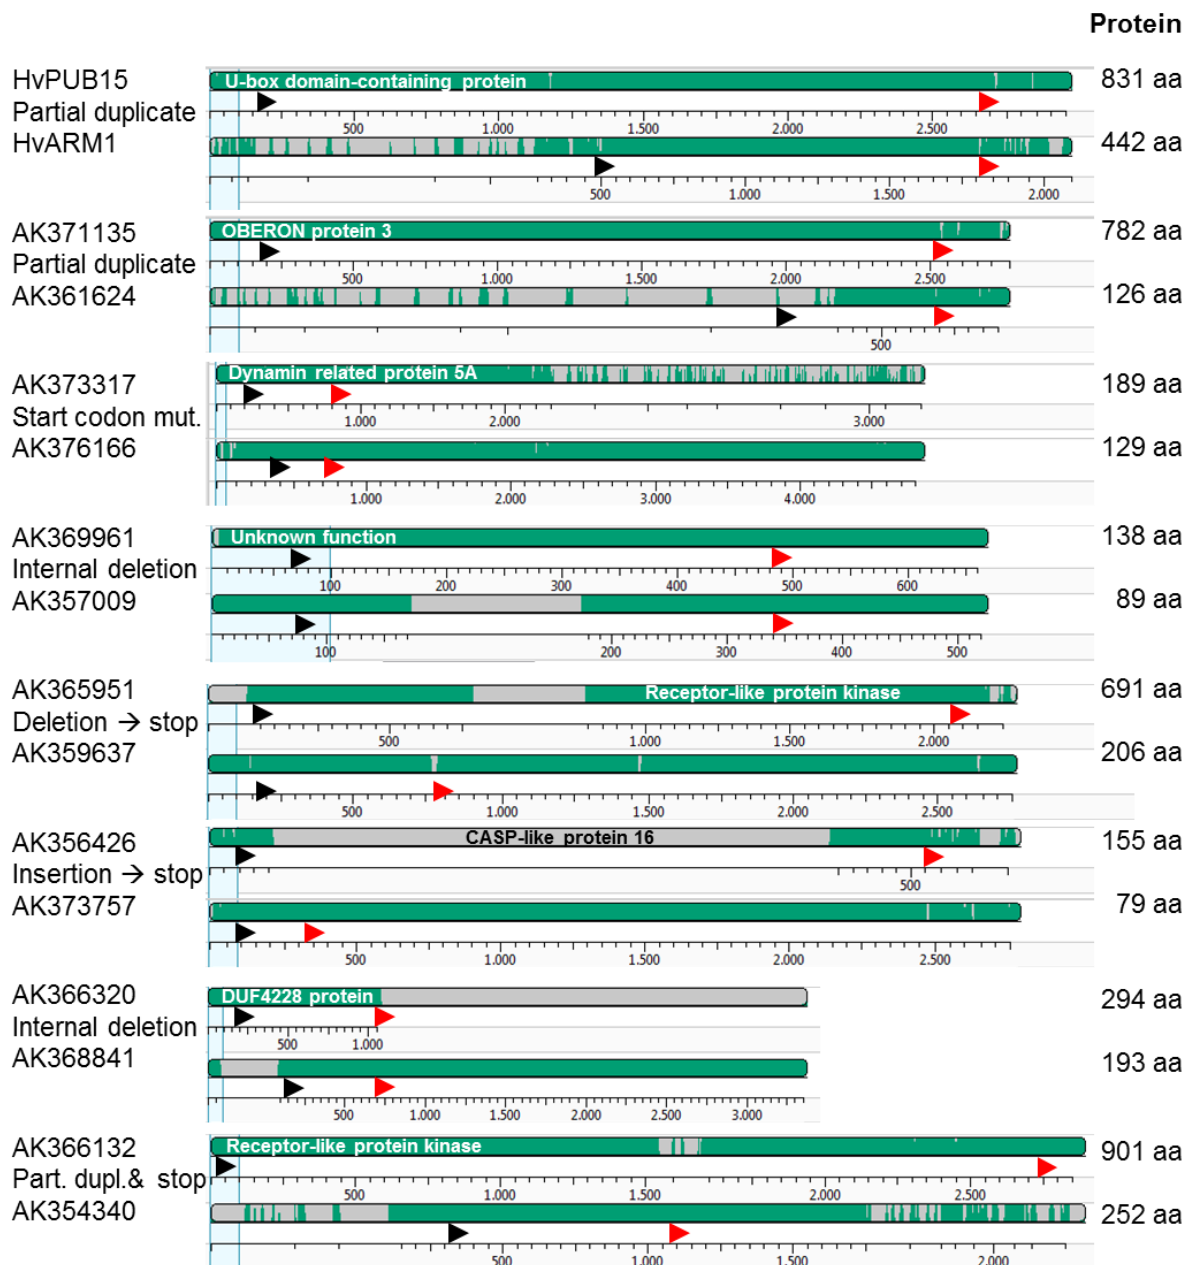

**Figure S13:** Genome-wide analysis of expressed and conserved gene duplicates.

Pairs of barley cDNA encoding full-length proteins and partial copies, respectively, were aligned using MUSCLE algorithm. The dark green shadings are aligning sequences whereas grey shadings show gaps. Black and red arrowheads indicate start- and stop-codon positions of the corresponding open reading frames, respectively. Gene IDs and resulting short ORF is given on the left and predicted amino acid (aa) length is given on the right. Annotation and further details can be found in the Additional file 2: Table S4.

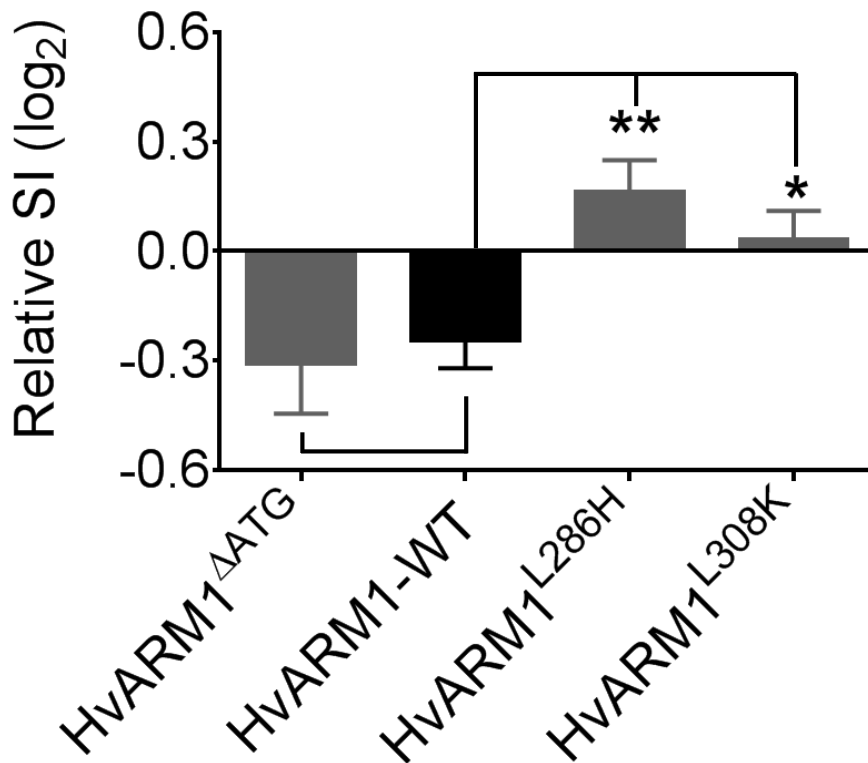

**Figure S14:** Mutation of HvARM1 disrupts its resistance-enhancing function.

*HvARM1*-WT (wildtype) or mutant versions without the translation-initiation codon (*HvARM1*<sup>ΔATG</sup>) or with single amino-acid exchange (*HvARM1*<sup>L286H</sup> and *HvARM1*<sup>L308K</sup>) were transiently expressed in barley epidermal cells of cv. Maythorpe, followed by *Bgh* inoculation 4 h after bombardment. Mean ± SE from 5-6 independent experiments of the relative susceptibility index (SI), normalized to the internal empty-vector control of each experiment, are shown. Normalized *HvARM1*-WT SI values compared against mutant versions (unpaired t-test; 1-tailed). Statistical differences are indicated by asterisks. \*, p<0.05; \*\*, p<0.005. Note that statistical significance of *HvARM1*-WT (SI values compared against the hypothetical value “0”; One-sample t-test; 1-tailed; \*, p<0.05) is not indicated for easy understanding. Mutated amino acid positions are indicated in Additional file 1: Figure S3-a. Amino acid code: L-Leucine; H-Histidine; K-Lysine.



**Table S8:** Description of HvARM1-interacting proteins.

| <b>Barley high-confidence gene ID</b> | <b>Description in bex-DB<sup>a</sup></b> | <b>Full-length cDNA clone ID NIAS<sup>b</sup></b> | <b>BlastX description (NCBI) of most significant hit</b>            | <b>InterProScan domain description<sup>c</sup></b> |
|---------------------------------------|------------------------------------------|---------------------------------------------------|---------------------------------------------------------------------|----------------------------------------------------|
| HORVU3Hr1G117760                      | DNAj type protein                        | FLbaf6n23                                         | DnaJ homolog subfamily C member 3 [Triticum urartu]                 | Tetratricopeptide repeat-containing domain         |
| HORVU2Hr1G041260                      | ToxA binding protein                     | NIASHv1005F13                                     | Chloroplast-localized Ptr ToxA-binding protein1 [Triticum aestivum] | Protein Thf1                                       |
| HORVU7Hr1G020580                      | Cadmium tolerant                         | NIASHv3024H04                                     | hypothetical protein TRIUR3_00244 [Triticum urartu]                 | None predicted                                     |
| HORVU2Hr1G080670                      | Microtubule associated complex           | NIASHv3078K10                                     | putative dynein light chain type 1 family protein [Zea mays]        | Dynein light chain superfamily                     |
| HORVU3Hr1G059130                      | Protein serine/threonine kinase activity | NIASHv1006F21                                     | protein kinase domain containing protein [Zea mays]                 | Protein kinase-like domain superfamily             |
| HORVU2Hr1G003460                      | ATP-Dependent Clp protease adaptor       | FLbaf7I02                                         | ATP-dependent Clp protease adapter protein ClpS [Aegilops tauschii] | Adaptor protein ClpS, core                         |

<sup>a</sup><http://www.plexdb.org/plex.php?database=Barley>

<sup>b</sup><http://barleyflc.dna.affrc.go.jp/bexdb/>

<sup>c</sup><http://www.ebi.ac.uk/interpro/>

**Table S9:** PCR primers used in this study.

| Gene or Construct                                 | Primer  | Sequence 5' to 3'                                        | Tm | Used for                     |
|---------------------------------------------------|---------|----------------------------------------------------------|----|------------------------------|
| <b>HvARM1<br/>TaqMan</b>                          | Forward | TCTCAGATGATAGTTATTGTTGTTG                                | 58 | Transcript<br>quantification |
|                                                   | Reverse | TAAACCCGAAGAATACACCA                                     |    |                              |
|                                                   | Probe   | 6FAM-TTGCTGTGTTTGTGACTGGTCG-BHQ1                         |    |                              |
| <b>HvPUB15<br/>TaqMan</b>                         | Forward | CGGTAAATTTGTTGACTGG                                      | 58 | Transcript<br>quantification |
|                                                   | Reverse | AACCGACAAAATACACCATC                                     |    |                              |
|                                                   | Probe   | 6FAM-TGAGTGTGGGCGTTGGTTGT-BHQ1                           |    |                              |
| <b>HvUBC2<br/>TaqMan</b>                          | Forward | ACTCCGAAGCAGCCAGAATG                                     | 58 | Transcript<br>quantification |
|                                                   | Reverse | GATCAAGCACAGGGACACAAC                                    |    |                              |
|                                                   | Probe   | Yakima yellow-AGAACAAGCGCGAGTACAACCGCAAGGTG-BHQ1         |    |                              |
| <b>pIPKTA30_HvARM1</b>                            | Forward | CTCTTTCCCGTGCATTTCC                                      | 61 | TIGS                         |
|                                                   | Reverse | AGATCATACTCAGAAACCAATGG                                  |    |                              |
| <b>pIPKTA30_HvPUB15</b>                           | Forward | GGAATTGAAACGGTCCACC                                      | 55 | TIGS                         |
|                                                   | Reverse | ACCTCCTTCGCCAGATCAA                                      |    |                              |
| <b>pGBKT7-HvARM1<br/>(bait)</b>                   | Forward | GTCTTTAGCATATGCAAATGGCTCTGCTAG                           | 60 | Y2H                          |
|                                                   | Reverse | ACCATCGTCGACATCTCCTTCCCGA                                |    |                              |
| <b>pGBKT7-HvPUB15<br/>(bait)</b>                  | Forward | TGATCCTCATATGGAAGATTTCTC                                 | 58 | Y2H                          |
|                                                   | Reverse | TGCTAACATCATCATATAATCATC                                 |    |                              |
| <b>pEARLYGATE104-<br/>HvARM1</b>                  | Forward | ggggACAAGTTTGTACAAAAAAGCAGGCTTCATGCAAATGGCTCTGCTAGCAAGGC | 58 | BiFC                         |
|                                                   | reverse | ggggACCACTTTGTACAAGAAAGCTGGGTTTTATCCTCATCTCCTTCCCGAGTTCC |    |                              |
| <b>pEARLYGATE104-<br/>HvPUB15<br/>-ARM domain</b> | Forward | ggggACAAGTTTGTACAAAAAAGCAGGCTTCATGAAAAGCCTGAACAGAGCA     | 58 | BiFC                         |
|                                                   | reverse | ggggACCACTTTGTACAAGAAAGCTGGGTTTCATCATCTCCTCGCCGAGTTCC    |    |                              |

|                          |                    |                                                                                                           |    |      |
|--------------------------|--------------------|-----------------------------------------------------------------------------------------------------------|----|------|
| <b>pGWB418-HvThf1</b>    | Forward<br>reverse | ggggACAAGTTTGTACAAAAAAGCAGGCTTCATGGCGGCCATATCGTCG<br>ggggACCACTTTGTACAAGAAAGCTGGGTATGCTTCAAGGGATAAGTGCTTC | 60 | BiFC |
| <b>pGWB418-HvClpS1</b>   | Forward<br>reverse | ggggACAAGTTTGTACAAAAAAGCAGGCTtcATGCTGCCAGGATGCTC<br>ggggACCACTTTGTACAAGAAAGCTGGGTCTATATGGGATGATATGTGTAAA  | 60 | BiFC |
| <b>pQE30-HvARM1</b>      | Forward<br>reverse | CGGGATCCATGCAAATGGCTCTGCT<br>GCTGCAGTCATCTCCTTCCCGAGTT                                                    | 60 | BiFC |
| <b>pGEX4T1-HvPUB15</b>   | Forward<br>reverse | CGGGATCCATGGAAGATTTCTCACC<br>AAGCGGCCGCTCATCTCCTCGCCGA                                                    | 60 | BiFC |
| <b>U35_19170 (DNAj)</b>  | Froward<br>Reverse | AACCAAGGAAGGAAGGAAGG<br>CATTTGAATAGTCTTTCAGTGCTAGC                                                        | 58 | TIGS |
| <b>U35_374 (ToxABP1)</b> | Froward<br>Reverse | CTTCCAGAGATGGGGAAATAGA<br>AAATTACAAAATACCAACTACTGCGA                                                      | 58 | TIGS |
| <b>HvARM1-S229G*</b>     | Froward<br>Reverse | CCCTCCTTAATTTGTCACTCGGTGATATCAATAAGATTGCC<br>CACGATGGCAATCTTATTGATATCACCGAGTGACAAATTAAGG                  | 55 | OEX  |
| <b>HvARM1-L286H*</b>     | Froward<br>Reverse | GTGCTGTAAAGCCTCACGTGGACTTGCTGGG<br>CCCATTTCCCAGCAAGTCCACGTGAGGCTTTAC                                      | 55 | OEX  |
| <b>HvARM1-L308K*</b>     | Froward<br>Reverse | AGAAAGATGCGGTTACTGCATTGTTTAATAAATCCATACTTCATGAGAAA<br>CCCTTGTTCTCATGAAGTATGGATTATTAAACAATGCAGTAACCGC      | 55 | OEX  |
| <b>HvPUB15-M242V*</b>    | Forward<br>reverse | TTTCCCTGGAGCTGGTGTCTGATCCTGTTA<br>AAAGGGACCTCGACCACAGACTAGGAC                                             | 60 | BiFC |
| <b>HvPUB15-P245A*</b>    | Forward<br>reverse | TTTCCCTGGAGCTGATGTCTGATGCTGTTA<br>AAAGGGACCTCGACTACAGACTACGAC                                             | 60 | BiFC |
| <b>U35_1321 (Cd.tol)</b> | Froward<br>Reverse | ATGGAGGCCAGTGAATTCCACC<br>AGCAGCAGCAGAGCCAGTCG                                                            | 58 | TIGS |

|                                             |                    |                                                                                                                      |    |                       |
|---------------------------------------------|--------------------|----------------------------------------------------------------------------------------------------------------------|----|-----------------------|
| <b>U35_23261 (Mic.tub)</b>                  | Forward<br>Reverse | GAGGCCAGTGAATTCCACCCAAG<br>ATTTGCGCTAAATCTACACTTG                                                                    | 58 | TIGS                  |
| <b>U35_22515 (kinase)</b>                   | Forward<br>Reverse | ATGAAGGAGCTGCCAGCTAGCC<br>ACTATGTACACCTGCTAAAAATG                                                                    | 58 | TIGS                  |
| <b>U35_829 (Clp-S1)</b>                     | Forward<br>Reverse | ATGCTGCCAGGATGCTC<br>TCAGCAGCCACCACTTGCAGG                                                                           | 58 | TIGS                  |
| <b>U35_374 (ToxABP1)</b>                    | Forward<br>Reverse | TGCTCTAGAGACTCTCCCATGGCGG<br>TGCTCTAGAGCGTTGAGTTAATGCTTC                                                             | 58 | OEX                   |
| <b>U35_829 (Clp-S1)</b>                     | Forward<br>Reverse | TGCTCTAGAGCCTCCTCCCCGGCAGC<br>GCTCTAGAGCTCAGCAGCCACCACTTGC                                                           | 55 | OEX                   |
| <b>pIPKTA48-YFP-HvARM1 (N-ter fusion)</b>   | Forward<br>Reverse | ggggACAAGTTTGTACAAAAAAGCAGGCTTCATGCAAATGGCTCTGCTAGCAAGGC<br>ggggACCACTTTGTACAAGAAAGCTGGGTTTTATCCTCATCTCCTTCCCGAGTTCC | 58 | Cellular localization |
| <b>pIPKTA49-YFP-HvPUB15 (C-ter fusion)</b>  | Forward<br>Reverse | ggggACAAGTTTGTACAAAAAAGCAGGCTATGGAAGATTTCTCACCGAGGGC<br>ggggACCACTTTGTACAAGAAAGCTGGGTGTCTCCTCGCCGAGTTCCCGT           | 58 | Cellular localization |
| <b>pIPKTA49-YFP-HvThf1(C-ter fusion)</b>    | Forward<br>Reverse | ggggACAAGTTTGTACAAAAAAGCAGGCTTATGGCGGCCATATCGTCGC<br>ggggACCACTTTGTACAAGAAAGCTGGGTGATGCTTCAAGGGATAAGTGCTT            | 60 | Cellular localization |
| <b>pIPKTA49-YFP-HvClp-S1 (C-ter fusion)</b> | Forward<br>Reverse | ggggACAAGTTTGTACAAAAAAGCAGGCTATGCTGCCAGGATGCTC<br>ggggACCACTTTGTACAAGAAAGCTGGGTGGCAGCCACCACTTGCAGGTT                 | 60 | Cellular localization |

|                       |                    |                                                               |    |                          |
|-----------------------|--------------------|---------------------------------------------------------------|----|--------------------------|
| <b>HptII</b>          | Forward<br>reverse | AGCTGCGCCGATGGTTTCTACAA<br>CATCGCCTCGCTCCAGTCAATG             | 58 | RNAi plants<br>screening |
| <b>RNAi repeat I</b>  | Forward<br>reverse | GGAGAGGACACGCTGAAATC<br>AGGCAACTAGATAACCATTTTCA               | 58 | RNAi plants<br>screening |
| <b>RNAi repeat II</b> | Forward<br>reverse | ATGAGCGAAACCCTATAAGAACCCTA<br>GGATAGCCCTCATAGATAGAGTACTAACTAA | 58 | RNAi plants<br>screening |
| <b>35Spro</b>         | Forward<br>reverse | GTGATTT <b>C</b> AGCGTGTCTCT<br>CAA CCA CGT CTT CAA AGC AA    | 58 | RNAi plants<br>screening |
| <b>HvGAPDH</b>        | Forward<br>reverse | CTAGCAGCCCTTCCACCTCTCCA<br>CAATGCTAGCTGCACCACCAACTG           | 58 | RNAi plants<br>screening |

\*- Mutated site is shown in bold font

**Table S10:** Sequences used for phylogenetic and  $d_N/d_S$  analyses

| sequence name | genomic                                                                                                   | transcripts                  | protein                   |
|---------------|-----------------------------------------------------------------------------------------------------------|------------------------------|---------------------------|
| OsPUB15       | NW_015379181.1:551574-556921 <sup>a</sup>                                                                 | XM_015795011 <sup>a</sup>    | XP_015650497 <sup>a</sup> |
| HvPUB15       | chr3H:689573847-689580280 <sup>b</sup>                                                                    | HORVU3Hr1G113910.3           | HORVU3Hr1G113910          |
| HvARM1        | chr3H:594730498-594734223 <sup>b</sup>                                                                    | HORVU3Hr1G081380.4           | HORVU3Hr1G081380          |
| ScPUB15       | Lo7_v2_scaffold_446234:9254-16180 <sup>c</sup>                                                            | KM881629 <sup>a</sup>        | AJN91234 <sup>a</sup>     |
| ScARM1        | Lo7_v2_scaffold_169416:20330-24274 <sup>c</sup>                                                           | KM881628 <sup>a</sup>        | AJL33746 <sup>a</sup>     |
| AesPub15      | TGAC_WGS_speltooides_v1_contig_203746:1-2698<br>TGAC_WGS_speltooides_v1_contig_252331:1-4357 <sup>d</sup> | inferred <sup>g</sup>        | inferred <sup>g</sup>     |
| AesARM1       | TGAC_WGS_speltooides_v1_contig_481548:2394-5169 <sup>d</sup>                                              | inferred <sup>g</sup>        | inferred <sup>g</sup>     |
| AetPUB15      | NW_017952709.1:1885887-1893057 <sup>a</sup>                                                               | XM_020311842 <sup>a</sup>    | XP_020167431 <sup>a</sup> |
| AetARM1       | NW_017937549.1:3945-7078 <sup>a</sup>                                                                     | XM_020296982 <sup>a</sup>    | XP_020152571 <sup>a</sup> |
| TuPUB15       | TGAC_WGS_urartu_v1_contig_1357654:1432-6837 <sup>d</sup>                                                  | TRIUR3_31889-T1 <sup>e</sup> | EMS61710 <sup>a</sup>     |
| TuARM1        | TGAC_WGS_urartu_v1_contig_181472:955-3868 <sup>d</sup>                                                    | TRIUR3_13873-T1 <sup>e</sup> | EMS55038 <sup>a</sup>     |
| TaA-PUB15     | TGACv1_scaffold_195661_3AL:30237-37497 <sup>e</sup>                                                       | AA0652480 <sup>e</sup>       | A0A1D5VCC0 <sup>f</sup>   |
| TaA-ARM1      | TGACv1_scaffold_196567_3AL:29997-33195 <sup>e</sup>                                                       | AA0661500 <sup>e</sup>       | W5CA56 <sup>f</sup>       |
| TaB-PUB15     | TGACv1_scaffold_222817_3B:15836-23050 <sup>e</sup>                                                        | AA0771270 <sup>e</sup>       | A0A077RF03 <sup>f</sup>   |
| TaB-ARM1      | TGACv1_scaffold_223941_3B:27077-30083 <sup>e</sup>                                                        | AA0789920 <sup>e</sup>       | A0A0H2UIP0 <sup>f</sup>   |
| TaD-PUB15     | TGACv1_scaffold_249335_3DL:122337-128710 <sup>e</sup>                                                     | AA0845740 <sup>e</sup>       | A0A1D5WE99 <sup>f</sup>   |
| TaD-ARM1      | TGACv1_scaffold_249751_3DL:39809-43090 <sup>e</sup>                                                       | AA0855640 <sup>e</sup>       | W5DDJ6 <sup>f</sup>       |

a: NCBI

b: [http://webblast.ipk-gatersleben.de/barley\\_ibsc](http://webblast.ipk-gatersleben.de/barley_ibsc)

c: Schmutzer T: Scaffolds of rye (*Secale cereale* L.) inbred line Lo7– version 2. <https://doi.org/10.5447/ipk/2016/56>

d: <https://urgi.versailles.inra.fr/blast/blast.php>

e: <http://ensembl.gramene.org/Tools/Blast?db=core>

f: UniprotKB

g: no transcripts or proteins directly available, open reading frames inferred by homology to the other sequences and especially the wheat B transcripts and translated in Geneious

1. Kearse M, Moir R, Wilson A, Stones-Havas S, Cheung M, Sturrock S, Buxton S, Cooper A, Markowitz S, Duran C, et al: **Geneious Basic: an integrated and extendable desktop software platform for the organization and analysis of sequence data.** *Bioinformatics* 2012, **28**:1647-1649.
2. Nelson BK, Cai X, Nebenfuhr A: **A multicolored set of in vivo organelle markers for co-localization studies in Arabidopsis and other plants.** *Plant J* 2007, **51**:1126-1136.
3. Stegmann M, Anderson RG, Ichimura K, Pecenkova T, Reuter P, Zarsky V, McDowell JM, Shirasu K, Trujillo M: **The ubiquitin ligase PUB22 targets a subunit of the exocyst complex required for PAMP-triggered responses in Arabidopsis.** *Plant Cell* 2012, **24**:4703-4716.
4. Waadt R, Schmidt LK, Lohse M, Hashimoto K, Bock R, Kudla J: **Multicolor bimolecular fluorescence complementation reveals simultaneous formation of alternative CBL/CIPK complexes in planta.** *Plant Journal* 2008, **56**:505-516.
5. Delventhal R, Rajaraman J, Stefanato FL, Rehman S, Aghnoum R, McGrann GRD, Bolger M, Usadel B, Hedley PE, Boyd L, et al: **A comparative analysis of nonhost resistance across the two Triticeae crop species wheat and barley.** *BMC Plant Biology* 2017, **17**:232.
6. Zimmermann G, Baumlein H, Mock HP, Himmelbach A, Schweizer P: **The multigene family encoding germin-like proteins of barley. Regulation and function in basal host resistance.** *Plant Physiology* 2006, **142**:181-192.
7. Nakagawa T, Kurose T, Hino T, Tanaka K, Kawamukai M, Niwa Y, Toyooka K, Matsuoka K, Jinbo T, Kimura T: **Development of series of gateway binary vectors, pGWBs, for realizing efficient construction of fusion genes for plant transformation.** *J Biosci Bioeng* 2007, **104**:34-41.
